# Supplementary material
Source: MDPI journal article supplement (https://www.mdpi.com/2072-4292/15/9/2475)
Supplement: s1 [file s1]

# Supplementary Information for Annual and seasonal trends of vegetation responses and feed-back to temperature on the Tibetan Plateau since the 1980s

Fangfang Wang<sup>1,2,3</sup>, Yaoming Ma<sup>1,2,4,5,6,7\*</sup>, Roshanak Darvishzadeh<sup>3</sup>, Cunbo Han<sup>1</sup>

<sup>1</sup> Land-Atmosphere Interaction and Its Climatic Effects Group, State Key Laboratory of Tibetan Plateau Earth System, Environment and Resources (TPESER), Institute of Tibetan Plateau Research, Chinese Academy of Sciences, Beijing 100101, China

<sup>2</sup> College of Earth and Planetary Sciences, University of Chinese Academy of Sciences, Beijing 100049, China

<sup>3</sup> Faculty of Geo-Information Science and Earth Observation (ITC), University of Twente, 7500 AE Enschede, The Netherlands

<sup>4</sup> College of Atmospheric Science, Lanzhou University, Lanzhou 730000, China

<sup>5</sup> National Observation and Research Station for Qomolangma Special Atmospheric Processes and Environmental Changes, Dingri 858200, China

<sup>6</sup> Kathmandu Center of Research and Education, Chinese Academy of Sciences, Beijing 100101, China

<sup>7</sup> China-Pakistan Joint Research Center on Earth Sciences, Chinese Academy of Sciences, Islamabad 45320, Pakistan

\* Correspondence: ymma@itpcas.ac.cn

## S1. Detailed procedures of SQMK test

Referring to [59,60], the SQMK test is calculated as follows:

For a time series of  $n$  samples,  $x_1, x_2, x_3, \dots, x_n$ ,

$$s_k = \sum_{i=1}^k r_i, k = 2, 3, \dots, n \quad (1)$$

where  $S_k$  represents the test statistic;  $r_i$  represents the number of time  $x_i > x_j$ ;  $x_i$  and  $x_j$  are the sequential values in a series and can be expressed as:

$$r_i = \begin{cases} 1, & x_i > x_j \\ 0, & x_i \leq x_j \end{cases} \quad j = 1, 2, \dots, i \quad (2)$$

The statistics  $UF_k$  is calculated by Eq. (3):

$$UF_k = \frac{[s_k - E(s_k)]}{\sqrt{\text{var}(s_k)}}, k = 2, 3, \dots, n \quad (3)$$

The mean and variance of  $S_k$  are  $E(S_k)$  and  $\text{var}(S_k)$ , respectively; and can be calculated by Eq. (4):

$$\begin{cases} E(s_k) = \frac{k(k-1)}{4}, \\ \text{var}(s_k) = \frac{k(k-1)(2k+5)}{72} \end{cases} \quad k = 2, 3, \dots, n \quad (4)$$

$$UB_k = \frac{[s'_k - E(s'_k)]}{\sqrt{\text{var}(s'_k)}}, k = 2, 3, \dots, n \quad (5)$$

where  $S'_k$ ,  $E(S'_k)$ , and  $\text{var}(S'_k)$  are calculated using the same equations for  $UF_k$ .

The curves of  $UF_k$  and  $UB_k$  are plotted between the confidence lines once they are estimated. If the two curves intersect within the specific threshold value of  $\pm 1.96$  or  $\pm 2.58$  (significance level of 0.05 or 0.01), their intersection point is the time of abrupt change (Here we set the  $\alpha$  value as 0.05, i.e., the confidence level is 95%).

As recommended by the World Meteorological Organization, the nonparametric Mann–Kendall (MK) test was used to calculate the significance level in NDVI, LST, and Albedo trends [43,44]. It is robust to outliers and missing data, and does not require samples to follow a certain distribution. The statistic  $S$  can be defined as follows in Eq. (6):

$$S = \sum_{i=1}^{n-1} \sum_{j=i+1}^n \text{sgn}(x_j - x_i) \quad (6)$$

where  $n$  is the number of samples and  $x_i$  and  $x_j$  are the value in time series  $i$  and  $j$ , respectively.

$$\text{sgn}(x_j - x_i) = \begin{cases} 1, & x_j - x_i > 0 \\ 0, & x_j - x_i = 0 \\ -1, & x_j - x_i < 0 \end{cases} \quad (7)$$

Where  $\text{sgn}(x_i - x_j)$  refers to the sign function.

The formula for calculating the standard normal distribution variable  $Z$  constructed is as follows:

$$Z = \begin{cases} \frac{S-1}{\sqrt{\text{var}(S)}}, & S > 0 \\ 0, & S = 0 \\ \frac{S+1}{\sqrt{\text{var}(S)}}, & S < 0 \end{cases} \quad (8)$$

The variance is computed as

$$\text{var}(S) = \frac{[n(n-1)(2n+5)] - \sum_{i=1}^m t_i(t_i-1)(2t_i+5)}{18} \quad (9)$$

where  $n$  is the number of data points,  $m$  is the number of tied groups, and  $t_i$  denotes the number of ties of extent  $i$ . A tied group is a set of sample data with the same value.

The statistics  $Z$ , was used to determine significant variation. The null hypothesis of no trend is rejected if  $|Z| \geq Z_{1-\frac{\alpha}{2}}$ , which means a significant trend exists in the time series, where  $\alpha$  is the statistical significance level concerned.

## S2. Detailed procedures of Sen's slope

The mathematical equation for calculating slope is defined in Eq. (10):

$$SS = \text{Median}[(X_j - X_i) / (j - i)] \quad (10)$$

Where  $X_j$  and  $X_i$  are the values in the  $j^{\text{th}}$  and  $i^{\text{th}}$  years, respectively. A positive value of  $SS$  indicates an increasing trend while a negative value indicates a decreasing trend.

## S3. Overall trends of NDVI, LST, and albedo over the Tibetan Plateau

We analyzed how key surface parameters changed on the TP from 2000 to 2021 at a finer scale by using MODIS products. The NDVI showed an increasing trend at all time-scales, with the most significant increase noted to have occurred during the spring (Figure S1a). The LST showed an increasing trend in summer and autumn, and on annual scales, but a decreasing trend in spring and winter (Figure S1b). Finally, albedo showed an increasing trend in the spring and winter, and on annual scale, but a decreasing trend in the summer and autumn (Figure S1c).

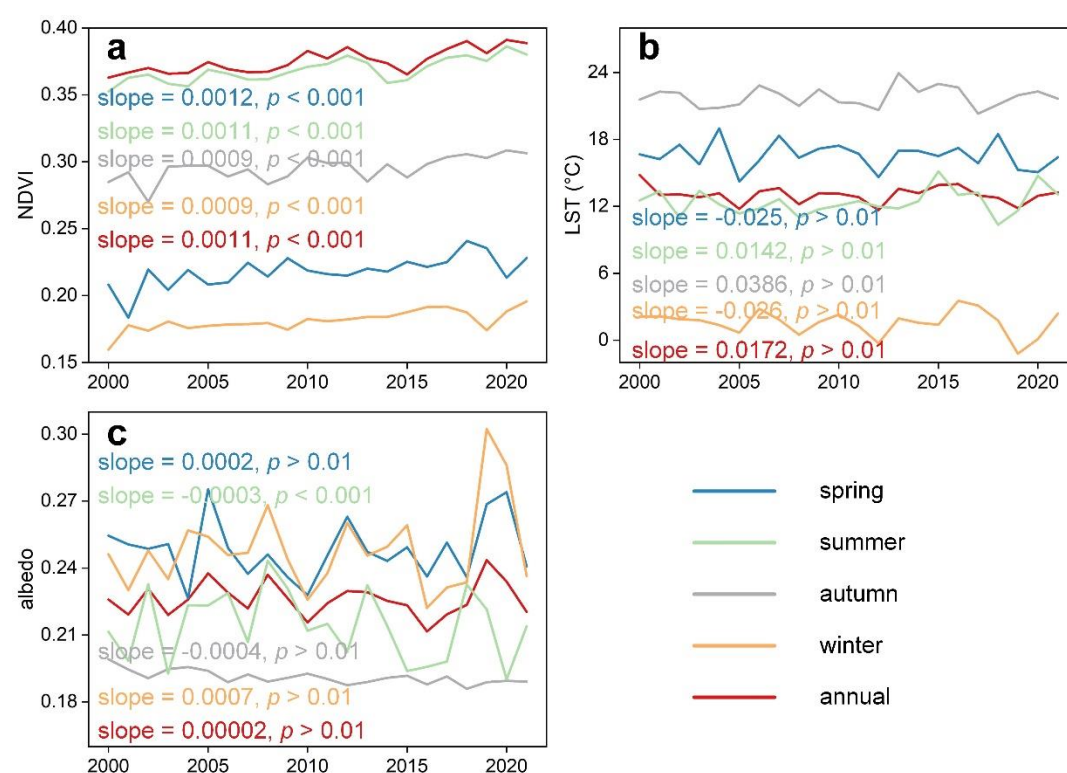

**Figure S1.** MODIS-based NDVI, LST, and albedo trends over the Tibetan Plateau at annual and seasonal scales during 2000–2021.

## References

59. Hussain, A.; Cao, J.; Ali, S.; Ullah, W.; Muhammad, S.; Hussain, I.; Rezaei, A.; Hamal, K.; Akhtar, M.; Abbas, H.; et al. Variability in Runoff and Responses to Land and Oceanic Parameters in the Source Region of the Indus River. *Ecol. Indic.* **2022**, *140*, 109014. <https://doi.org/10.1016/j.ecolind.2022.109014>.
60. Ullah, S.; You, Q.; Ullah, W.; Ali, A. Observed Changes in Precipitation in China-Pakistan Economic Corridor during 1980–2016. *Atmos. Res.* **2018**, *210*, 1–14. <https://doi.org/10.1016/j.atmosres.2018.04.007>.
